# Supplementary material for: Perceptions of Public University Students towards Online Classes during COVID-19 Pandemic in Bangladesh
Source: Preprints.org preprint supplement (doi:10.20944/preprints202105.0516.v1), 2021-05-21
Supplement: Supplementary file 1 [file supplementary]

Supplementary Material

# Sample of the 20 Survey questions

1. What is your age? Please write in number; such as: 22

- ……………………………………..

1. What is your gender?

- Male
- Female

1. What is your educational qualification?

- Undergraduate
- Graduate
- Others

1. What is marital status?

- Married
- Unmarried

1. What is the name of your University?

- ………………………………………

1. Which area you live in?

- Rural
- Urban

1. Which electronic devices you use to attend in online classes?

- Mobile
- Laptop/PC

1. Which type of network connection you use to join in online classes?

- Mobile network
- Broadband connection

| **Scale:** 1=**Strong Disagree**, 2=**Disagree**, 3= **Neutral**, 4=**Agree**, 5= **Strongly Agree** | **1** | **2** | **3** | **4** | **5** |
| --- | --- | --- | --- | --- | --- |
| I had no problems communicating with my teacher when I have questions or concerns during an online class. |  |  |  |  |  |
| I never had any difficulties communicating with my classmates during online classes. |  |  |  |  |  |
| I think I learn just as much as online class as I would sitting in normal class. |  |  |  |  |  |
| I feel that I am challenged as much in an online class environment as I would normally be in a traditional classroom. |  |  |  |  |  |
| I will participate in all the online classes. |  |  |  |  |  |
| The content of the lecture are clearly understood in the online classes. |  |  |  |  |  |
| I have more flexibility in online classes than the traditional classes. |  |  |  |  |  |
| Online assignments were helpful in understanding the course contents. |  |  |  |  |  |
| I am able to take class notes in online classes like as traditional classes. |  |  |  |  |  |
| The opportunity of participating in online classes is really helpful in this pandemic. |  |  |  |  |  |
| I would recommend my friends to participate in online classes. |  |  |  |  |  |
| I do not face any trouble in accessing online classes. |  |  |  |  |  |
